# Supplementary material for: Hydrangea arborescens ‘Annabelle’ Flower Formation and Flowering in the Current Year
Source: MDPI journal article supplement (doi:10.3390/plants12244103), 2023-12-07
Supplement: s1 [file s1]

## Supplementary Tables

**Table S1.** Statistics of the quality of the sequencing data

| Sample | Raw Reads | Raw Bases | Clean Reads | Clean Bases | Q30 (%) | GC (%) |
|--------|-----------|-----------|-------------|-------------|---------|--------|
| VS     | 46.74M    | 7.01G     | 46.54M      | 6.96G       | 93.94   | 44.63  |
| FI     | 40.91M    | 6.14G     | 40.74M      | 6.09G       | 93.89   | 44.37  |
| FM     | 46.87M    | 7.03G     | 46.67M      | 6.97G       | 94.01   | 44.69  |
| BS-1   | 44.06M    | 6.61G     | 43.87M      | 6.55G       | 94.23   | 44.68  |
| BS-2   | 41.63M    | 6.24G     | 41.46M      | 6.18G       | 94.53   | 44.62  |
| BS-3   | 51.91M    | 7.79G     | 51.72M      | 7.72G       | 93.85   | 44.79  |
| FS     | 52.85M    | 7.93G     | 52.65M      | 7.86G       | 94.13   | 45.05  |

**Table S2.** Assembly statistics of the clean reads

| Unigenes Num | GC percentage(%) | N50 number | N50 length | Max length | Min length | Average length |
|--------------|------------------|------------|------------|------------|------------|----------------|
| 72,614       | 39.85            | 12,481     | 1,828      | 69,246     | 201        | 1,043          |

**Table S3.** Functional annotation statistics to four databases

| Database   | Number | Percentage (%) |
|------------|--------|----------------|
| Nr         | 35,109 | 48.35          |
| KEGG       | 34,367 | 47.33          |
| KOG        | 20,697 | 28.50          |
| Swiss-Prot | 25,616 | 35.28          |

**Table S4.** The top 20 pathway of KEGG enrichment analysis**Comparison between VS and FI stages**

| Pathway_ID | Pathway                                               | TEST | P-value     | FDR      |
|------------|-------------------------------------------------------|------|-------------|----------|
| ko00905    | Brassinosteroid biosynthesis                          | 9    | 3.13E-09    | 3.64E-07 |
| ko01110    | Biosynthesis of secondary metabolites                 | 173  | 2.10E-06    | 1.22E-04 |
| ko01100    | Metabolic pathways                                    | 276  | 2.15E-05    | 6.02E-04 |
| ko00073    | Cutin, suberine and wax biosynthesis                  | 11   | 2.30E-05    | 6.02E-04 |
| ko00904    | Diterpenoid biosynthesis                              | 10   | 2.60E-05    | 6.02E-04 |
| ko00941    | Flavonoid biosynthesis                                | 12   | 0.000418712 | 7.78E-03 |
| ko00940    | Phenylpropanoid biosynthesis                          | 25   | 0.000469385 | 7.78E-03 |
| ko00909    | Sesquiterpenoid and triterpenoid biosynthesis         | 7    | 0.000574501 | 8.33E-03 |
| ko00380    | Tryptophan metabolism                                 | 16   | 0.001201258 | 1.55E-02 |
| ko04075    | Plant hormone signal transduction                     | 37   | 0.002168271 | 2.32E-02 |
| ko00908    | Zeatin biosynthesis                                   | 6    | 0.002202735 | 2.32E-02 |
| ko00195    | Photosynthesis                                        | 14   | 0.003413644 | 3.30E-02 |
| ko00906    | Carotenoid biosynthesis                               | 7    | 0.008398379 | 7.49E-02 |
| ko00945    | Stilbenoid, diarylheptanoid and gingerol biosynthesis | 7    | 0.01908082  | 1.49E-01 |
| ko00460    | Cyanoamino acid metabolism                            | 9    | 0.01926321  | 1.49E-01 |
| ko00240    | Pyrimidine metabolism                                 | 10   | 0.02236994  | 1.62E-01 |
| ko00901    | Indole alkaloid biosynthesis                          | 2    | 0.04092927  | 2.73E-01 |
| ko00330    | Arginine and proline metabolism                       | 11   | 0.0454186   | 2.73E-01 |
| ko00430    | Taurine and hypotaurine metabolism                    | 3    | 0.04888333  | 2.73E-01 |
| ko04141    | Protein processing in endoplasmic reticulum           | 35   | 0.0491084   | 2.73E-01 |

**Comparison between FI and FM stages**

| Pathway_ID | Pathway                                               | TEST | P-value     | FDR      |
|------------|-------------------------------------------------------|------|-------------|----------|
| ko01100    | Metabolic pathways                                    | 432  | 3.13E-09    | 3.64E-07 |
| ko01110    | Biosynthesis of secondary metabolites                 | 249  | 2.10E-06    | 1.22E-04 |
| ko00196    | Photosynthesis - antenna proteins                     | 20   | 2.15E-05    | 6.02E-04 |
| ko00941    | Flavonoid biosynthesis                                | 20   | 2.30E-05    | 6.02E-04 |
| ko00630    | Glyoxylate and dicarboxylate metabolism               | 30   | 2.60E-05    | 6.02E-04 |
| ko00270    | Cysteine and methionine metabolism                    | 34   | 0.000418712 | 7.78E-03 |
| ko04146    | Peroxisome                                            | 31   | 0.000469385 | 7.78E-03 |
| ko00940    | Phenylpropanoid biosynthesis                          | 32   | 0.000574501 | 8.33E-03 |
| ko00999    | Biosynthesis of various plant secondary metabolites   | 18   | 0.001201258 | 1.55E-02 |
| ko00195    | Photosynthesis                                        | 19   | 0.002168271 | 2.32E-02 |
| ko00260    | Glycine, serine and threonine metabolism              | 20   | 0.002202735 | 2.32E-02 |
| ko00945    | Stilbenoid, diarylheptanoid and gingerol biosynthesis | 11   | 0.003413644 | 3.30E-02 |
| ko00073    | Cutin, suberine and wax biosynthesis                  | 10   | 0.008398379 | 7.49E-02 |
| ko01040    | Biosynthesis of unsaturated fatty acids               | 14   | 0.01908082  | 1.49E-01 |
| ko04075    | Plant hormone signal transduction                     | 48   | 0.01926321  | 1.49E-01 |
| ko00910    | Nitrogen metabolism                                   | 13   | 0.02236994  | 1.62E-01 |
| ko01200    | Carbon metabolism                                     | 70   | 0.04092927  | 2.73E-01 |
| ko04016    | MAPK signaling pathway - plant                        | 33   | 0.0454186   | 2.73E-01 |

|                |                                               |           |                 |                 |
|----------------|-----------------------------------------------|-----------|-----------------|-----------------|
| ko00053        | Ascorbate and aldarate metabolism             | 20        | 0.04888333      | 2.73E-01        |
| ko00906        | Carotenoid biosynthesis                       | 9         | 0.0491084       | 2.73E-01        |
| ko00250        | Alanine, aspartate, and glutamate metabolism  | 16        | 0.00487         | 2.78E-02        |
| ko00360        | Phenylalanine metabolism                      | 14        | 0.005177        | 2.82E-02        |
| <b>ko00380</b> | <b>Tryptophan metabolism</b>                  | <b>18</b> | <b>0.00578</b>  | <b>3.02E-02</b> |
| ko00350        | Tyrosine metabolism                           | 17        | 0.006428        | 3.21E-02        |
| ko00950        | Isoquinoline alkaloid biosynthesis            | 9         | 0.010869        | 5.22E-02        |
| ko00480        | Glutathione metabolism                        | 25        | 0.012594        | 5.66E-02        |
| ko00710        | Carbon fixation in photosynthetic organisms   | 23        | 0.012733        | 5.66E-02        |
| ko00410        | beta-Alanine metabolism                       | 15        | 0.014673        | 6.29E-02        |
| ko00909        | Sesquiterpenoid and triterpenoid biosynthesis | 6         | 0.015892        | 6.58E-02        |
| <b>ko00904</b> | <b>Diterpenoid biosynthesis</b>               | <b>7</b>  | <b>0.022473</b> | <b>8.91E-02</b> |

#### Comparison between FM and BS-1 stages

| Pathway_ID     | Pathway                                               | TEST      | P-value         | FDR             |
|----------------|-------------------------------------------------------|-----------|-----------------|-----------------|
| ko00196        | Photosynthesis - antenna proteins                     | 24        | 3.72E-09        | 4.76E-07        |
| ko00941        | Flavonoid biosynthesis                                | 24        | 3.01E-08        | 1.59E-06        |
| <b>ko00940</b> | <b>Phenylpropanoid biosynthesis</b>                   | <b>49</b> | <b>4.37E-08</b> | <b>1.59E-06</b> |
| ko01100        | Metabolic pathways                                    | 494       | 4.96E-08        | 1.59E-06        |
| ko03030        | DNA replication                                       | 21        | 5.00E-07        | 1.28E-05        |
| <b>ko00904</b> | <b>Diterpenoid biosynthesis</b>                       | <b>15</b> | <b>1.28E-06</b> | <b>2.73E-05</b> |
| ko01110        | Biosynthesis of secondary metabolites                 | 287       | 5.57E-06        | 1.02E-04        |
| ko00945        | Stilbenoid, diarylheptanoid and gingerol biosynthesis | 16        | 1.54E-05        | 2.47E-04        |
| ko00073        | Cutin, suberine and wax biosynthesis                  | 14        | 7.24E-05        | 1.03E-03        |
| <b>ko00908</b> | <b>Zeatin biosynthesis</b>                            | <b>10</b> | <b>8.98E-05</b> | <b>1.15E-03</b> |
| ko00040        | Pentose and glucuronate interconversions              | 28        | 0.000106        | 1.24E-03        |
| <b>ko04075</b> | <b>Plant hormone signal transduction</b>              | <b>64</b> | <b>0.000181</b> | <b>1.93E-03</b> |
| ko00195        | Photosynthesis                                        | 24        | 0.000233        | 2.30E-03        |
| <b>ko00380</b> | <b>Tryptophan metabolism</b>                          | <b>25</b> | <b>0.000424</b> | <b>3.87E-03</b> |
| ko04626        | Plant-pathogen interaction                            | 62        | 0.000621        | 5.30E-03        |
| ko04016        | MAPK signaling pathway - plant                        | 43        | 0.000889        | 7.11E-03        |
| <b>ko00905</b> | <b>Brassinosteroid biosynthesis</b>                   | <b>6</b>  | <b>0.001006</b> | <b>7.57E-03</b> |
| ko00906        | Carotenoid biosynthesis                               | 11        | 0.002552        | 1.81E-02        |
| ko00410        | beta-Alanine metabolism                               | 20        | 0.003746        | 2.52E-02        |
| ko00053        | Ascorbate and aldarate metabolism                     | 24        | 0.005079        | 3.25E-02        |

#### Comparison between BS-1 and BS-2 stages

| Pathway_ID     | Pathway                               | TEST      | P-value         | FDR             |
|----------------|---------------------------------------|-----------|-----------------|-----------------|
| <b>ko00940</b> | <b>Phenylpropanoid biosynthesis</b>   | <b>70</b> | <b>3.56E-12</b> | <b>2.93E-10</b> |
| ko00196        | Photosynthesis - antenna proteins     | 32        | 4.81E-12        | 2.93E-10        |
| ko01100        | Metabolic pathways                    | 674       | 5.25E-09        | 2.13E-07        |
| ko00195        | Photosynthesis                        | 37        | 1.61E-07        | 4.91E-06        |
| ko01110        | Biosynthesis of secondary metabolites | 393       | 3.51E-07        | 8.57E-06        |
| ko03030        | DNA replication                       | 25        | 4.95E-07        | 1.01E-05        |

|         |                                                       |    |          |          |
|---------|-------------------------------------------------------|----|----------|----------|
| ko00710 | Carbon fixation in photosynthetic organisms           | 48 | 5.99E-06 | 1.04E-04 |
| ko00941 | Flavonoid biosynthesis                                | 23 | 4.14E-05 | 6.31E-04 |
| ko00073 | Cutin, suberine and wax biosynthesis                  | 15 | 0.000675 | 9.15E-03 |
| ko00945 | Stilbenoid, diarylheptanoid and gingerol biosynthesis | 15 | 0.002327 | 2.84E-02 |
| ko00910 | Nitrogen metabolism                                   | 19 | 0.002588 | 2.87E-02 |
| ko00062 | Fatty acid elongation                                 | 15 | 0.002898 | 2.95E-02 |
| ko00901 | Indole alkaloid biosynthesis                          | 4  | 0.004699 | 4.07E-02 |
| ko00480 | Glutathione metabolism                                | 42 | 0.004739 | 4.07E-02 |
| ko00270 | Cysteine and methionine metabolism                    | 46 | 0.00501  | 4.07E-02 |
| ko00360 | Phenylalanine metabolism                              | 21 | 0.005561 | 4.24E-02 |
| ko01040 | Biosynthesis of unsaturated fatty acids               | 19 | 0.006996 | 5.02E-02 |
| ko00909 | Sesquiterpenoid and triterpenoid biosynthesis         | 9  | 0.009356 | 6.34E-02 |
| ko00950 | Isoquinoline alkaloid biosynthesis                    | 13 | 0.013495 | 8.67E-02 |
| ko01230 | Biosynthesis of amino acids                           | 84 | 0.019407 | 1.13E-01 |

#### Comparison between BS-2 and BS-3 stages

| Pathway_ID | Pathway                                               | TEST | P-value  | FDR      |
|------------|-------------------------------------------------------|------|----------|----------|
| ko03010    | Ribosome                                              | 151  | 7.95E-10 | 1.02E-07 |
| ko00040    | Pentose and glucuronate interconversions              | 41   | 1.92E-07 | 1.23E-05 |
| ko00073    | Cutin, suberine and wax biosynthesis                  | 19   | 1.93E-06 | 8.23E-05 |
| ko00940    | Phenylpropanoid biosynthesis                          | 54   | 7.13E-06 | 2.28E-04 |
| ko01100    | Metabolic pathways                                    | 632  | 6.51E-05 | 1.67E-03 |
| ko01110    | Biosynthesis of secondary metabolites                 | 357  | 0.001643 | 3.51E-02 |
| ko00906    | Carotenoid biosynthesis                               | 13   | 0.003377 | 6.17E-02 |
| ko00908    | Zeatin biosynthesis                                   | 9    | 0.004646 | 7.43E-02 |
| ko00945    | Stilbenoid, diarylheptanoid and gingerol biosynthesis | 14   | 0.005368 | 7.63E-02 |
| ko00910    | Nitrogen metabolism                                   | 17   | 0.01146  | 1.47E-01 |
| ko00500    | Starch and sucrose metabolism                         | 51   | 0.020133 | 2.34E-01 |
| ko00941    | Flavonoid biosynthesis                                | 16   | 0.024361 | 2.46E-01 |
| ko00905    | Brassinosteroid biosynthesis                          | 5    | 0.024945 | 2.46E-01 |
| ko00999    | Biosynthesis of various plant secondary metabolites   | 21   | 0.02862  | 2.62E-01 |
| ko00520    | Amino sugar and nucleotide sugar metabolism           | 41   | 0.033399 | 2.73E-01 |
| ko00460    | Cyanoamino acid metabolism                            | 16   | 0.035224 | 2.73E-01 |
| ko00750    | Vitamin B6 metabolism                                 | 6    | 0.038246 | 2.73E-01 |
| ko00901    | Indole alkaloid biosynthesis                          | 3    | 0.038388 | 2.73E-01 |
| ko00430    | Taurine and hypotaurine metabolism                    | 5    | 0.04598  | 2.96E-01 |
| ko00195    | Photosynthesis                                        | 22   | 0.046267 | 2.96E-01 |

#### Comparison between BS-3 and FS stages

| Pathway_ID | Pathway                               | TEST | P-value  | FDR      |
|------------|---------------------------------------|------|----------|----------|
| ko01100    | Metabolic pathways                    | 779  | 1.34E-30 | 1.75E-28 |
| ko01110    | Biosynthesis of secondary metabolites | 447  | 3.51E-16 | 2.30E-14 |
| ko00195    | Photosynthesis                        | 49   | 1.88E-14 | 8.22E-13 |
| ko00196    | Photosynthesis - antenna proteins     | 32   | 8.70E-12 | 2.85E-10 |

|         |                                                     |    |             |          |
|---------|-----------------------------------------------------|----|-------------|----------|
| ko00999 | Biosynthesis of various plant secondary metabolites | 35 | 1.48E-07    | 3.87E-06 |
| ko00073 | Cutin, suberine and wax biosynthesis                | 20 | 7.38E-07    | 1.61E-05 |
| ko00040 | Pentose and glucuronate interconversions            | 39 | 4.39E-06    | 7.85E-05 |
| ko04075 | Plant hormone signal transduction                   | 91 | 4.79E-06    | 7.85E-05 |
| ko00904 | Diterpenoid biosynthesis                            | 16 | 2.08E-05    | 3.03E-04 |
| ko00500 | Starch and sucrose metabolism                       | 64 | 6.81E-05    | 8.92E-04 |
| ko00460 | Cyanoamino acid metabolism                          | 23 | 0.000122667 | 1.46E-03 |
| ko00909 | Sesquiterpenoid and triterpenoid biosynthesis       | 12 | 0.000165504 | 1.81E-03 |
| ko00350 | Tyrosine metabolism                                 | 31 | 0.000220656 | 2.22E-03 |
| ko00260 | Glycine, serine and threonine metabolism            | 32 | 0.000363227 | 3.40E-03 |
| ko00905 | Brassinosteroid biosynthesis                        | 7  | 0.000995308 | 8.69E-03 |
| ko00630 | Glyoxylate and dicarboxylate metabolism             | 41 | 0.001642304 | 1.34E-02 |
| ko00910 | Nitrogen metabolism                                 | 19 | 0.003317366 | 2.56E-02 |
| ko00710 | Carbon fixation in photosynthetic organisms         | 37 | 0.0150878   | 1.10E-01 |
| ko00360 | Phenylalanine metabolism                            | 19 | 0.02859593  | 1.87E-01 |
| ko00130 | Ubiquinone and other terpenoid-quinone biosynthesis | 17 | 0.02859746  | 1.87E-01 |

**Table S9.** The Gene-specific primer sequences used in qRT-PCR.

| Gene Name     | Forward Primer Sequence (5'–3') | Reverse Primer Sequence (5'–3') |
|---------------|---------------------------------|---------------------------------|
| <i>EF1-β</i>  | CGCAGCTGTTTTAGGGAAGCC           | GCGAGCTGCGAAGACACAGA            |
| <i>FLC</i>    | AGAGCCAAATGGTGAGCAACT           | GCAGCAATCTCCTTTGCGAG            |
| <i>CLF</i>    | TTTGCTATCGGCTGGTGATAA           | TCCAGTACCGTCCGTAGAAG            |
| <i>ARF2-2</i> | ATACTTGATGAACCCACTG             | CTCCACCTGATTATTAGCAC            |
| <i>SPL4</i>   | GTACCACCGTAGGCACAAGG            | TCTTCCTACGCCGCTCATTG            |
| <i>SPL6-2</i> | GGTTGATTGGAGGGAGACCG            | GCCGTTCCGGGATCTCTTTGA           |
| <i>FD</i>     | TACTAAAGACCCCTCCGGCGA           | CGGGTCGGAGCTTCCAATAA            |
| <i>LFY</i>    | CCGGATTTCTTGCGGTACCT            | TGAGCAGTGCCGTGATTTCT            |
| <i>SOC1-2</i> | GCGTATAGAGAACGCGACGA            | TCAGCATCGCAAAGAACCGA            |
| <i>COL2</i>   | TGTGCCAGTTCAGTGTGGAG            | GTGACTGATTGGAGCAGGGT            |
| <i>AGL15</i>  | GAAGGGTTATTGTCGGTGAA            | TGTCGGCGTAATGTCTCG              |
| <i>GAIL</i>   | ACAGAGGGTTCGTCGCTAA             | GCTCCACCATCGTCAATAT             |

**Table S10.** The reaction system and reaction processes used for qRT-PCR.

| The Reaction System       |       |                  | The Reaction Process |           |  |
|---------------------------|-------|------------------|----------------------|-----------|--|
| TB Green Premix Ex Taq II | 10μL  | Pre-denaturation | 95°C                 | 1 cycle   |  |
| Forward Primer            | 0.4μL |                  | 95°C                 |           |  |
| Reverse Primer            | 0.4μL | PCR reaction     | 60°C                 | 40 cycles |  |
| cDNA                      | 2μL   |                  | 72°C                 |           |  |
| Total volume              | 20μL  | Melting curve    | 60-95°C              |           |  |
