# Supplementary material for: Hydrangea arborescens ‘Annabelle’ Flower Formation and Flowering in the Current Year
Source: MDPI journal article supplement (doi:10.3390/plants12244103), 2023-12-07
Supplement: s1 [file s1]

## Supplementary Figures

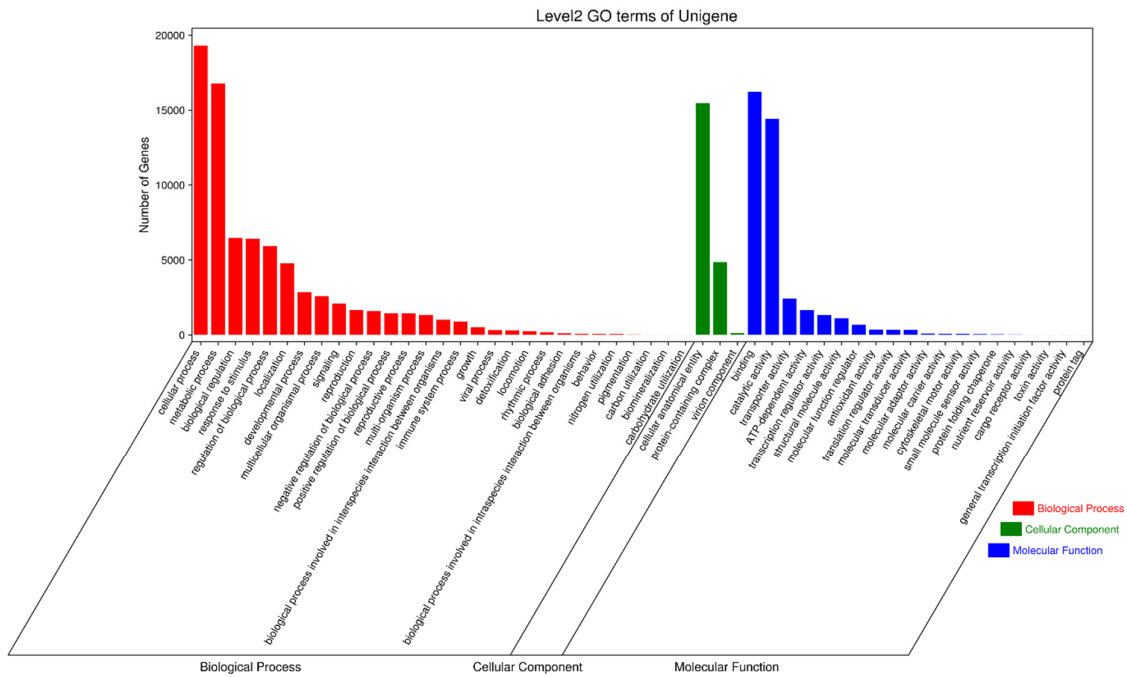

**Figure S1.** Gene ontology (GO) classification analysis different expression genes (DEGs) during the current-year flower development in *Hydrangea arborescens* ‘Annabelle’

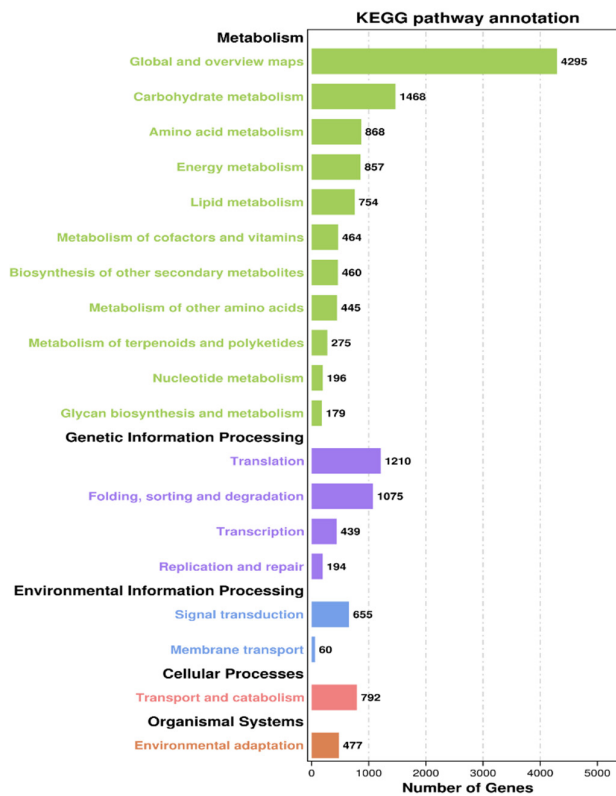

**Figure S2.** KEGG classification analysis different expression genes (DEGs) during the current-year flower development in *Hydrangea arborescens* ‘Annabelle’

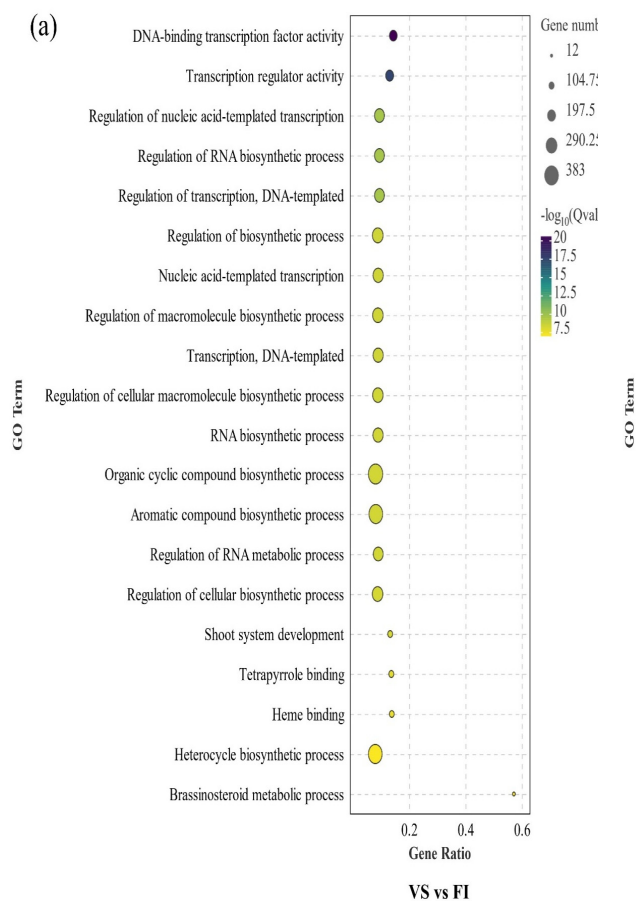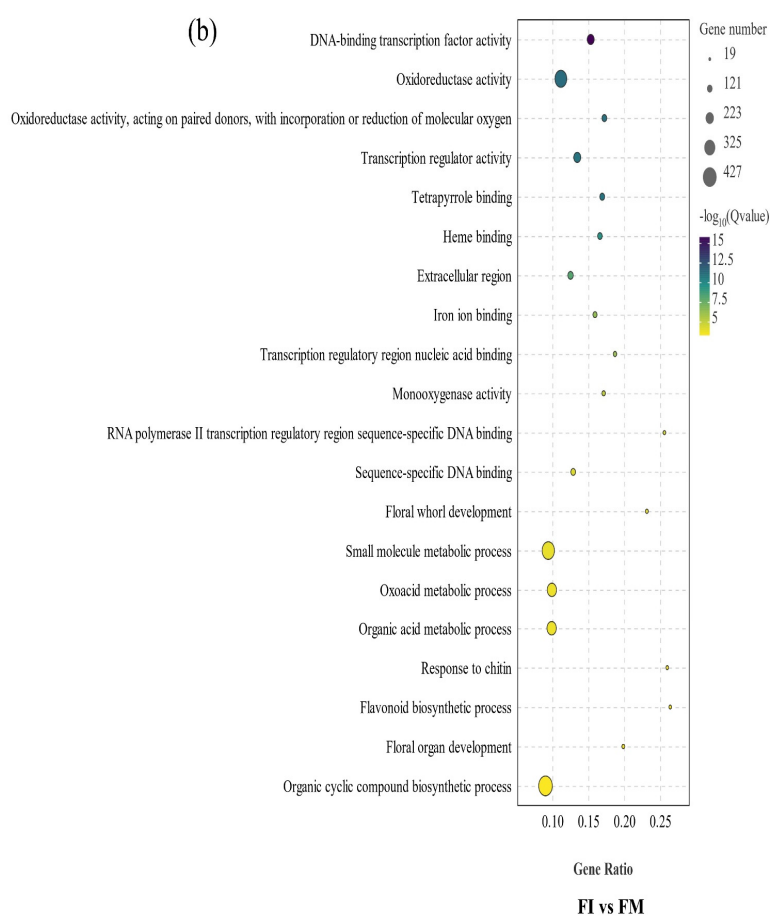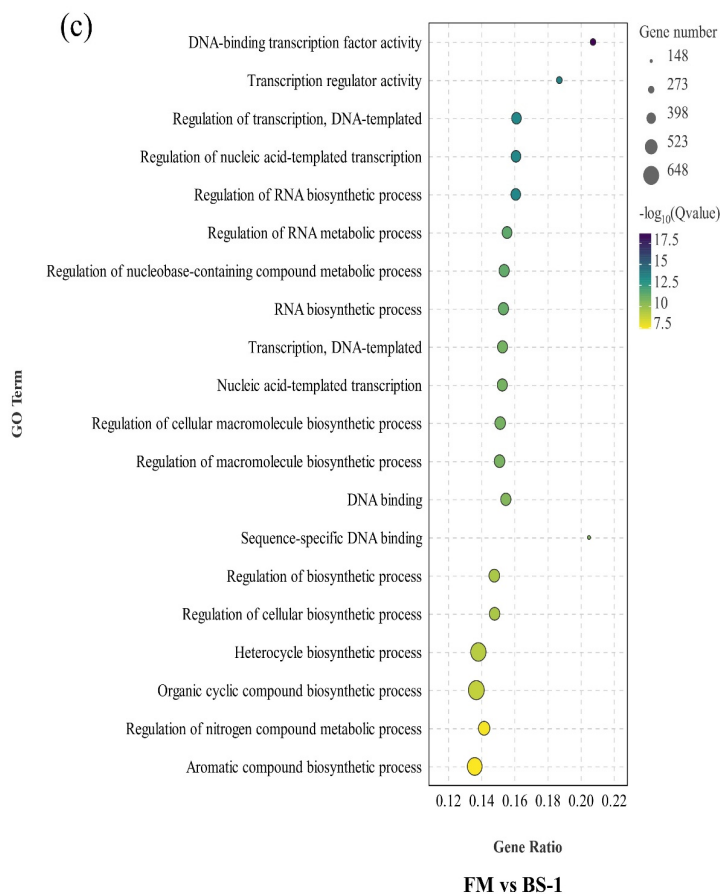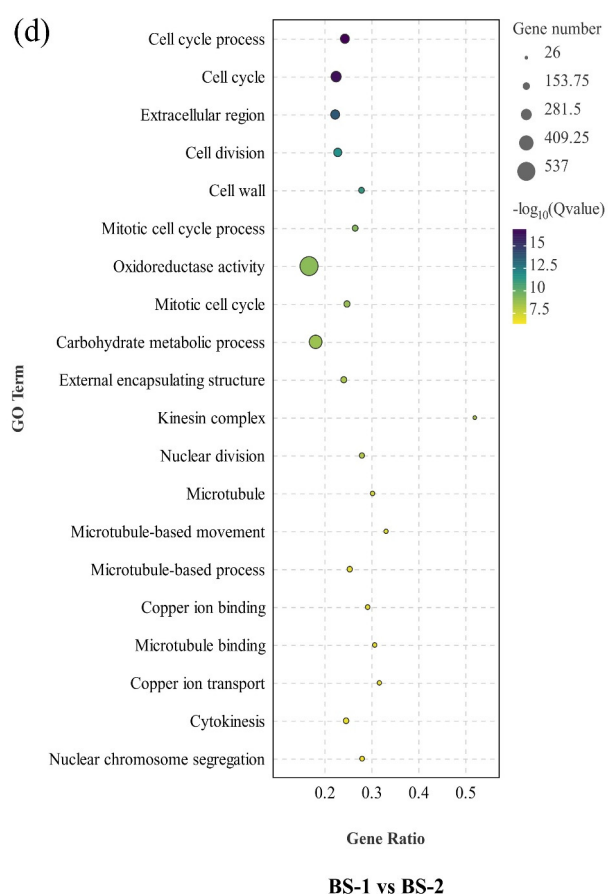

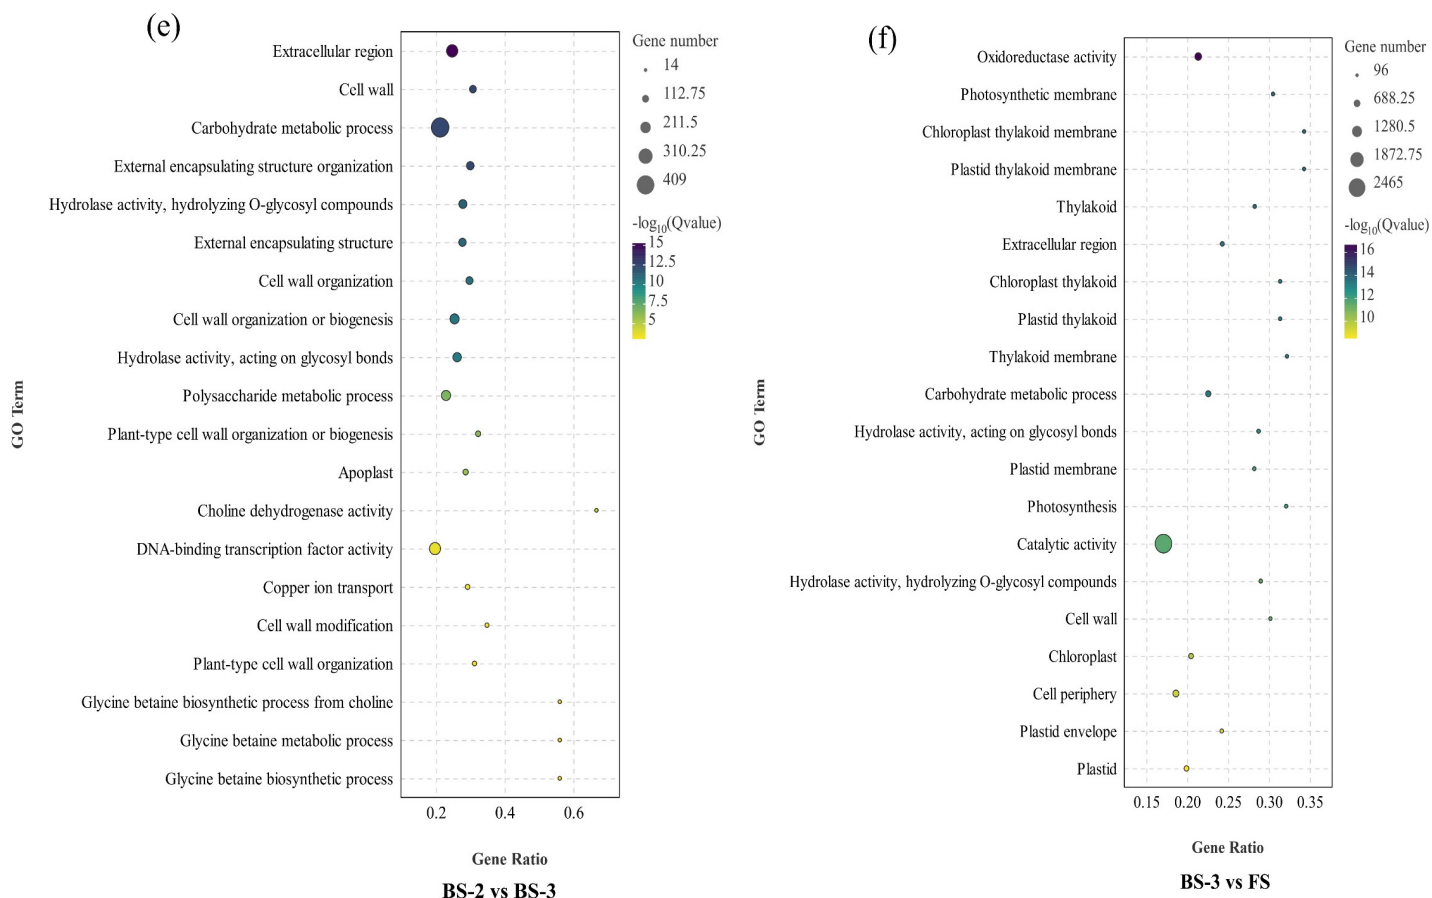

**Figure S3.** GO term enrichment analysis of DEGs during flower development

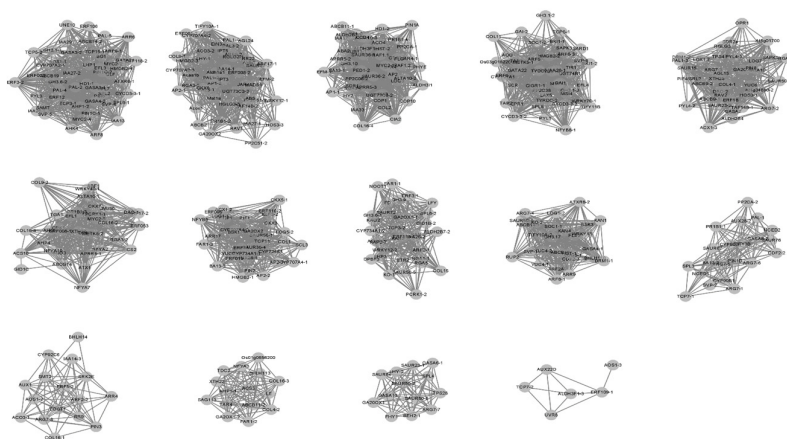

**Figure S4.** Summary of MCL gene co-expression network (GCN) . The network consisted of 14 biological meaningful clusters.
